# Supplementary material
Source: publisher figshare collection journal article supplement (https://acs.figshare.com/ndownloader/files/3745234)

**Supporting Information for**  
**Stable TEMPO and ABNO Reagent Solutions for User-Friendly (bpy)Cu/Nitroxyl-**  
**Catalyzed Aerobic Alcohol Oxidation**

Janelle E. Steves and Shannon S. Stahl\*

*Department of Chemistry, University of Wisconsin-Madison,  
1101 University Avenue, Madison, WI 53706*

stahl@chem.wisc.edu

| <b>Table of Contents</b>                                          | <b>Page</b> |
|-------------------------------------------------------------------|-------------|
| I. Enantiomer Analysis for <i>N</i> -Boc-L- <i>tert</i> -Leucinal | S2          |
| II. <sup>1</sup> H and <sup>13</sup> C NMR Spectra                | S5          |

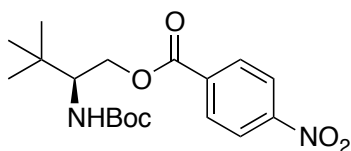

**(*S*)-2-((Boc)amino)-3,3-dimethylbutyl-4-nitrobenzoate.**

The product was prepared according to literature procedure described in the manuscript.

Analysis of (*S*)-2-((Boc)amino)-3,3-dimethylbutyl-4-nitrobenzoate from 1 mmol scale oxidation of *N*-Boc-*L*-*tert*-leucinol.

Chiralcel OJ-*H*, 5-25% iPrOH, 1 mL/min, 254 nm, >99% ee

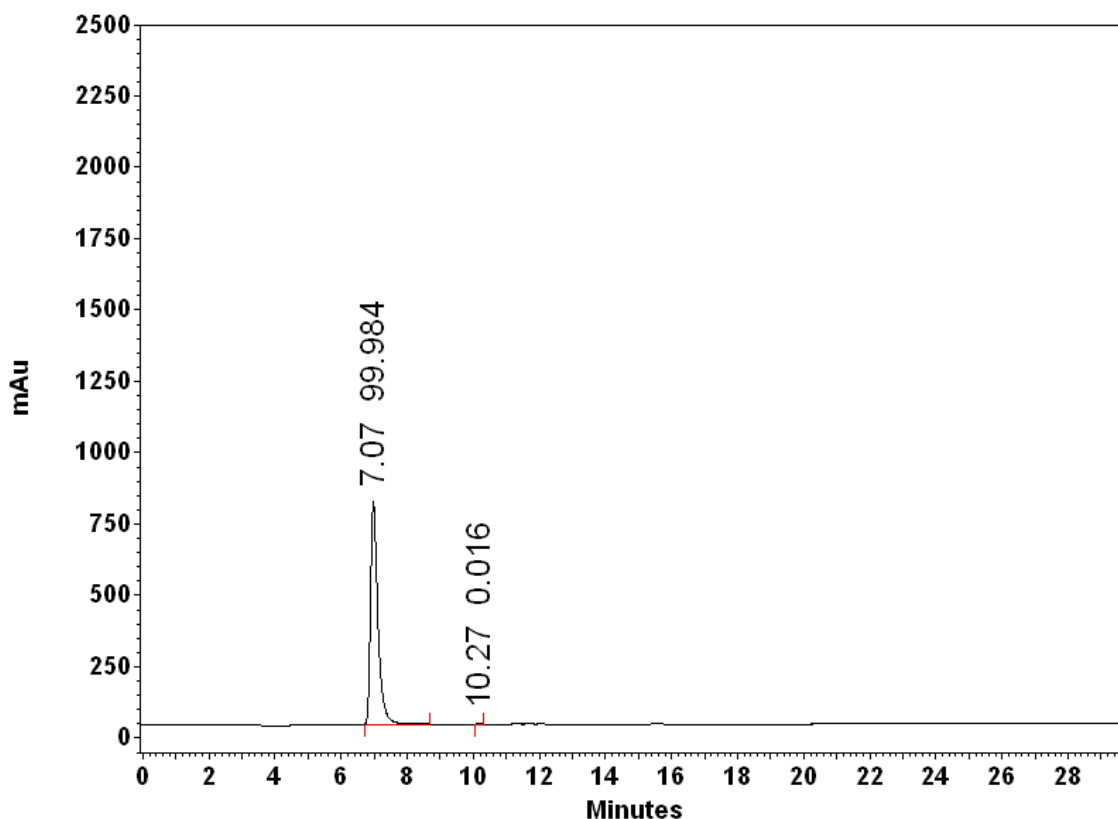

**Reference HPLC Traces for Enantiomeric Assignment.**

Reference HPLC traces were obtained with racemic ester derived from commercially obtained *tert*-leucinol and with independent samples of the esters derived from D- and L-*tert*-leucinol. The following data and the method for independent preparation of the nitrobenzyl esters can be found in our previously published work.

HPLC trace of racemic 2-((Boc)amino)-3,3-dimethylbutyl-4-nitrobenzoate. Chiralcel OJ-*H*, 5-25% iPrOH, 1 mL/min, 254 nm

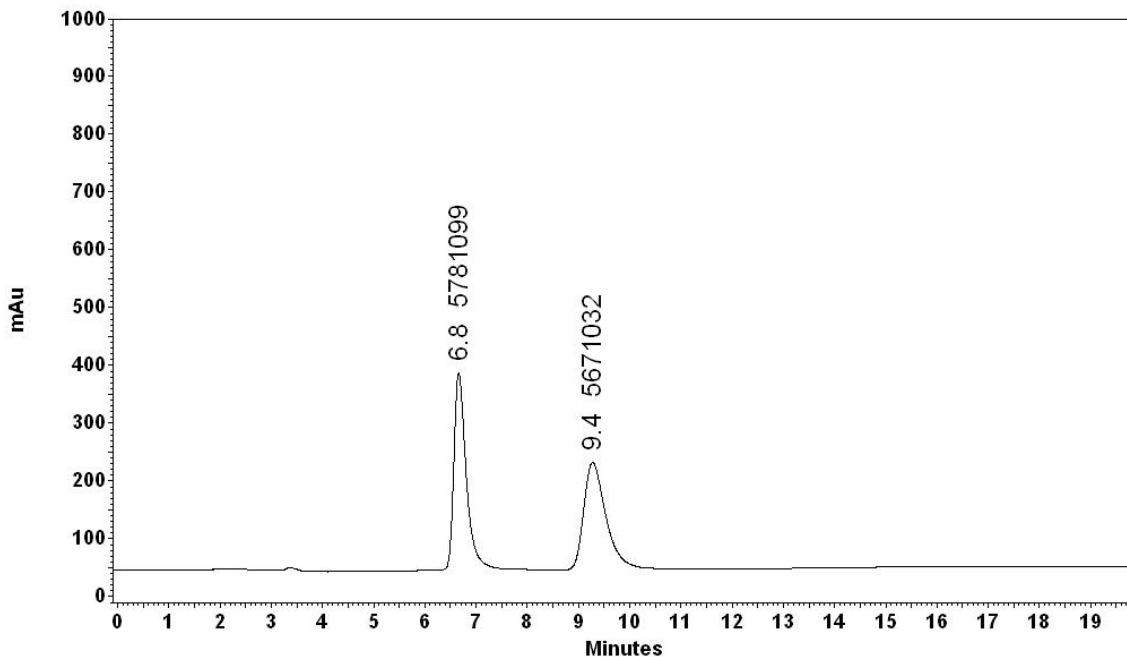

HPLC trace of (*R*)-2-((Boc)amino)-3,3-dimethylbutyl-4-nitrobenzoate. 97% ee. Chiralcel OJ-*H*, 5-25% iPrOH, 1 mL/min, 254 nm

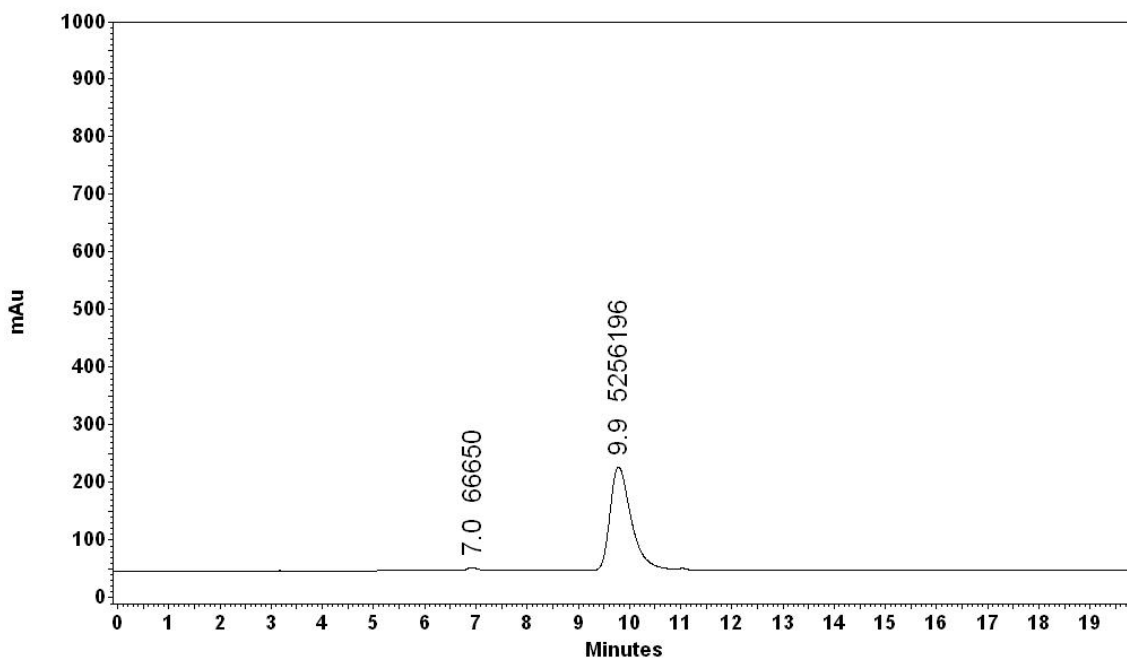

HPLC trace of (*S*)-2-((Boc)amino)-3,3-dimethylbutyl-4-nitrobenzoate. >99% ee. Chiralcel OJ-*H*, 5-25% iPrOH, 1 mL/min, 254 nm

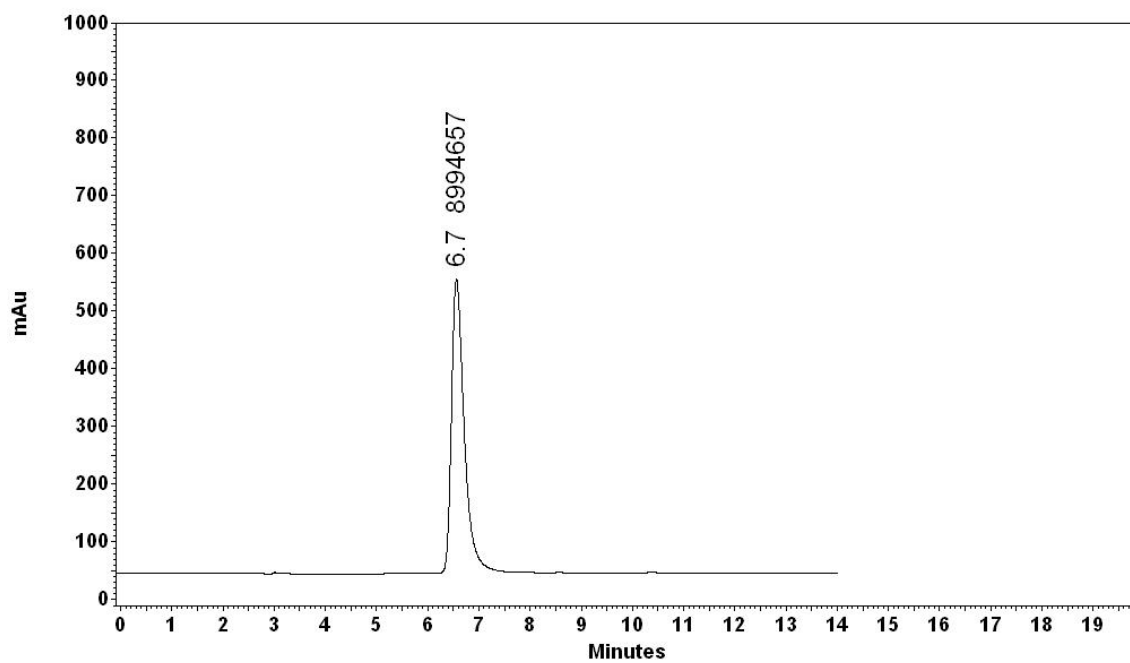

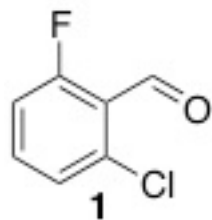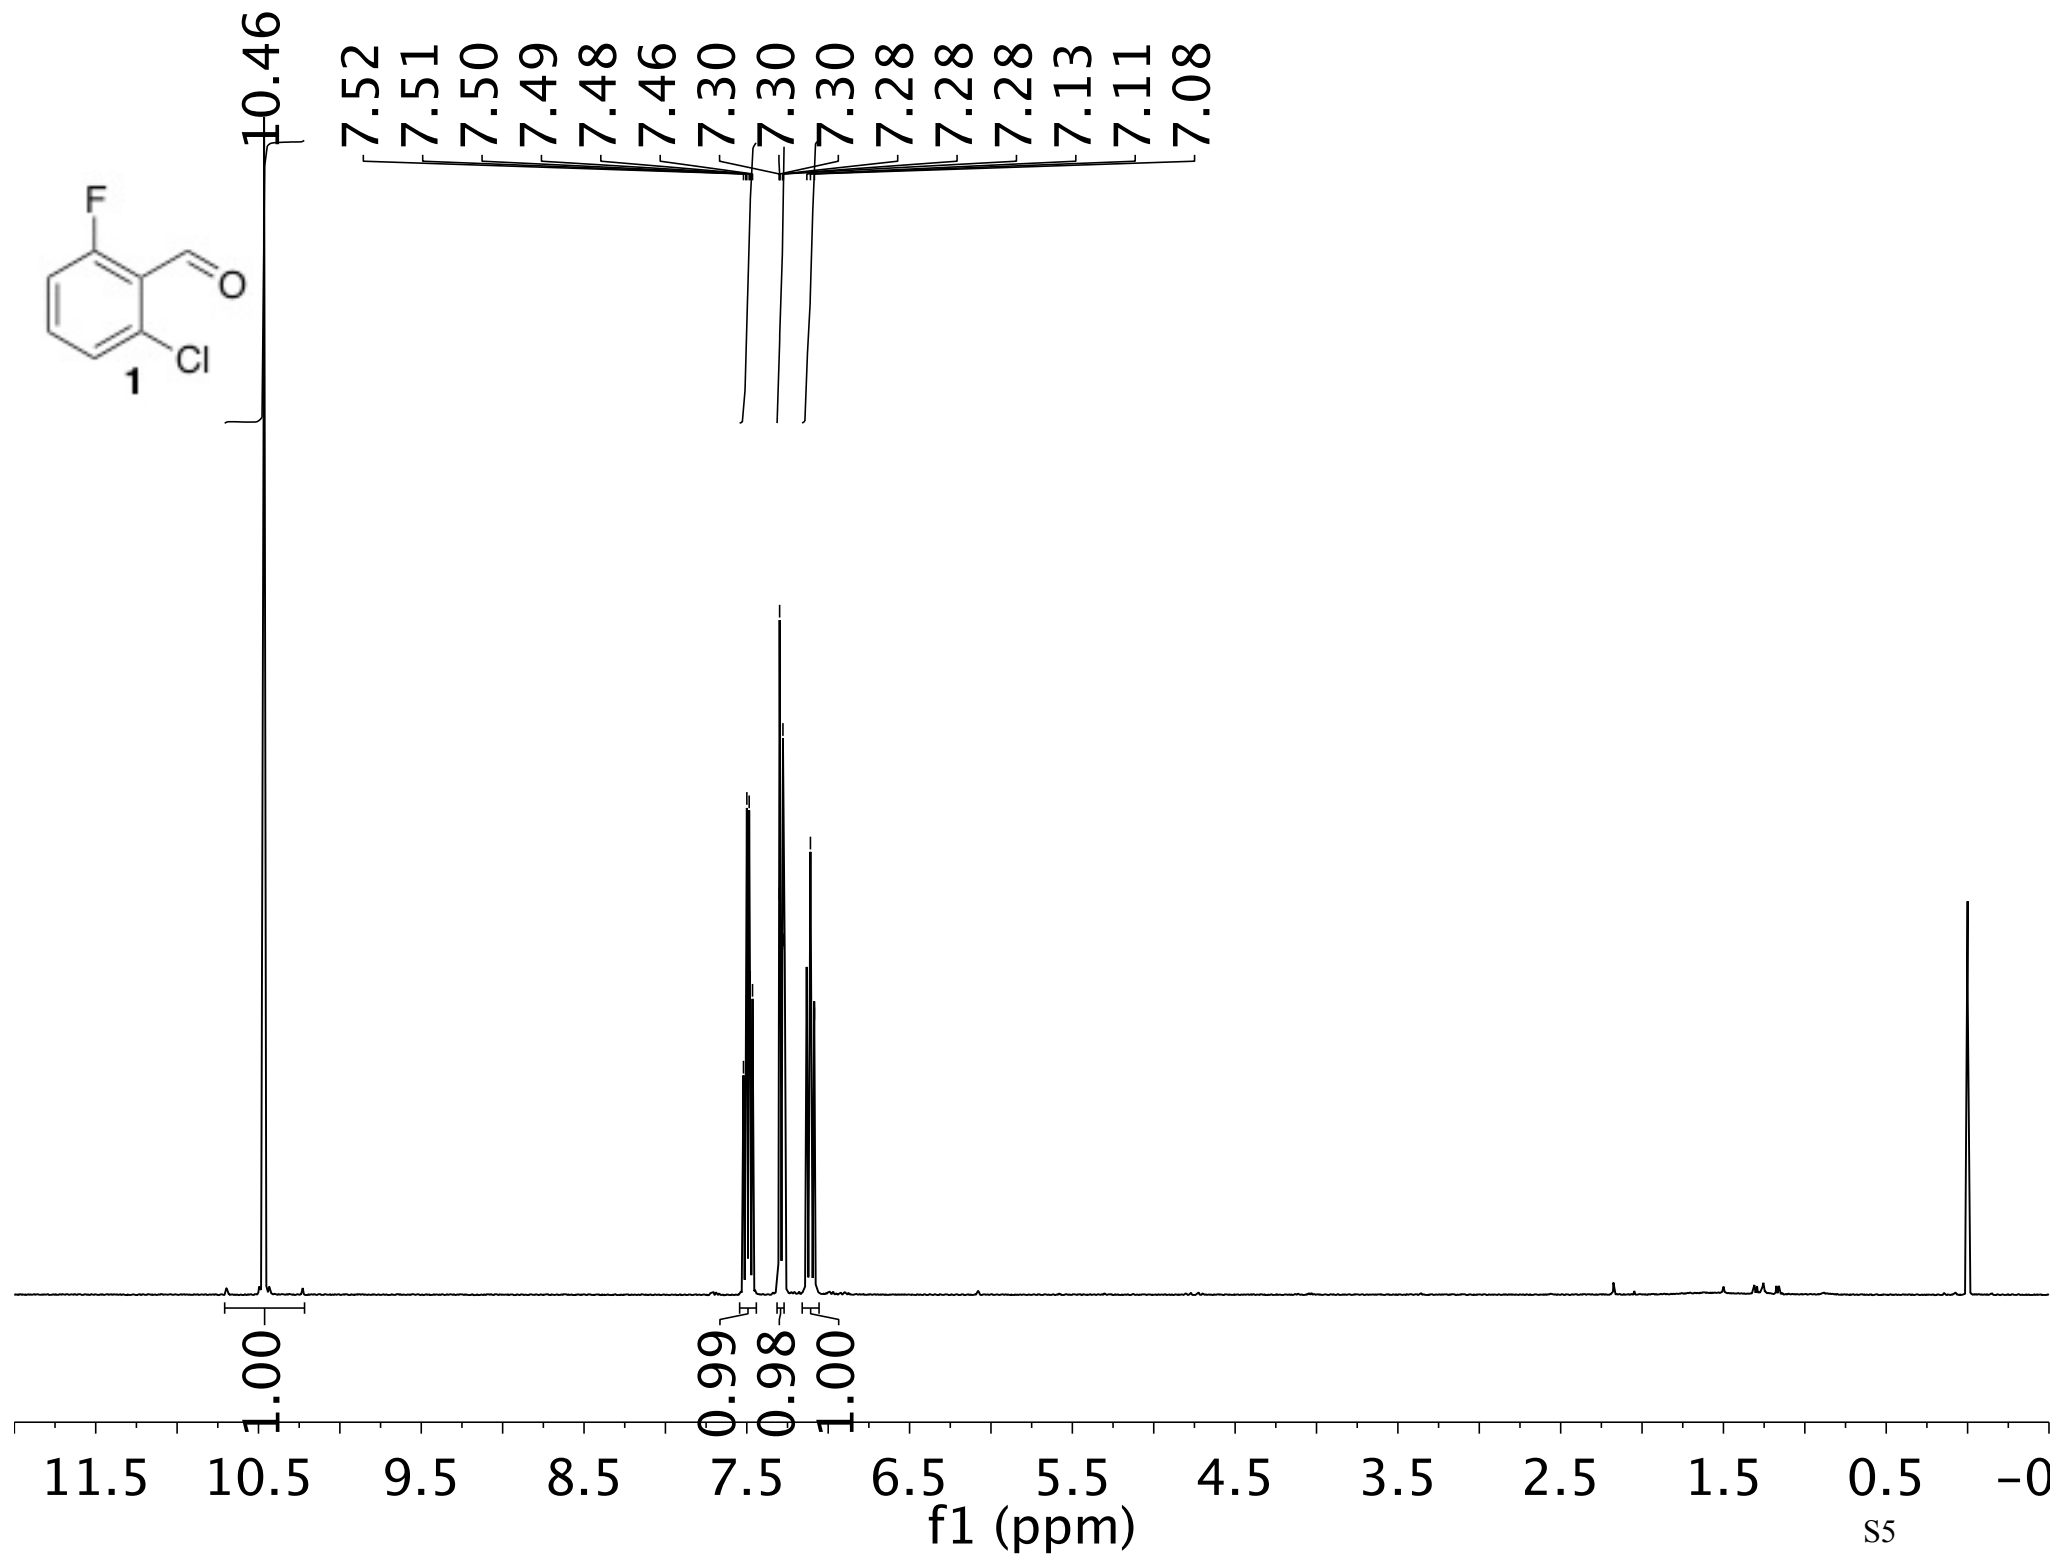

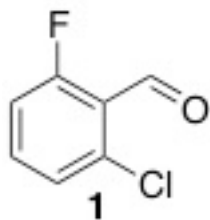

187.28  
187.25  
164.91  
162.28  
137.46  
137.43  
135.55  
135.45  
127.14  
127.10  
122.21  
122.11  
116.10  
115.89

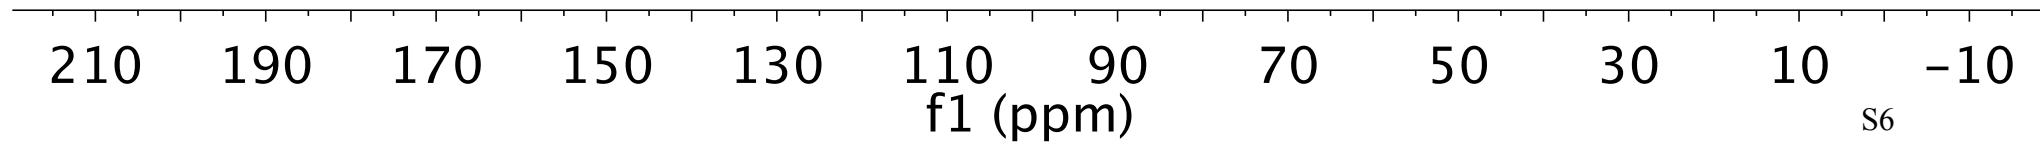

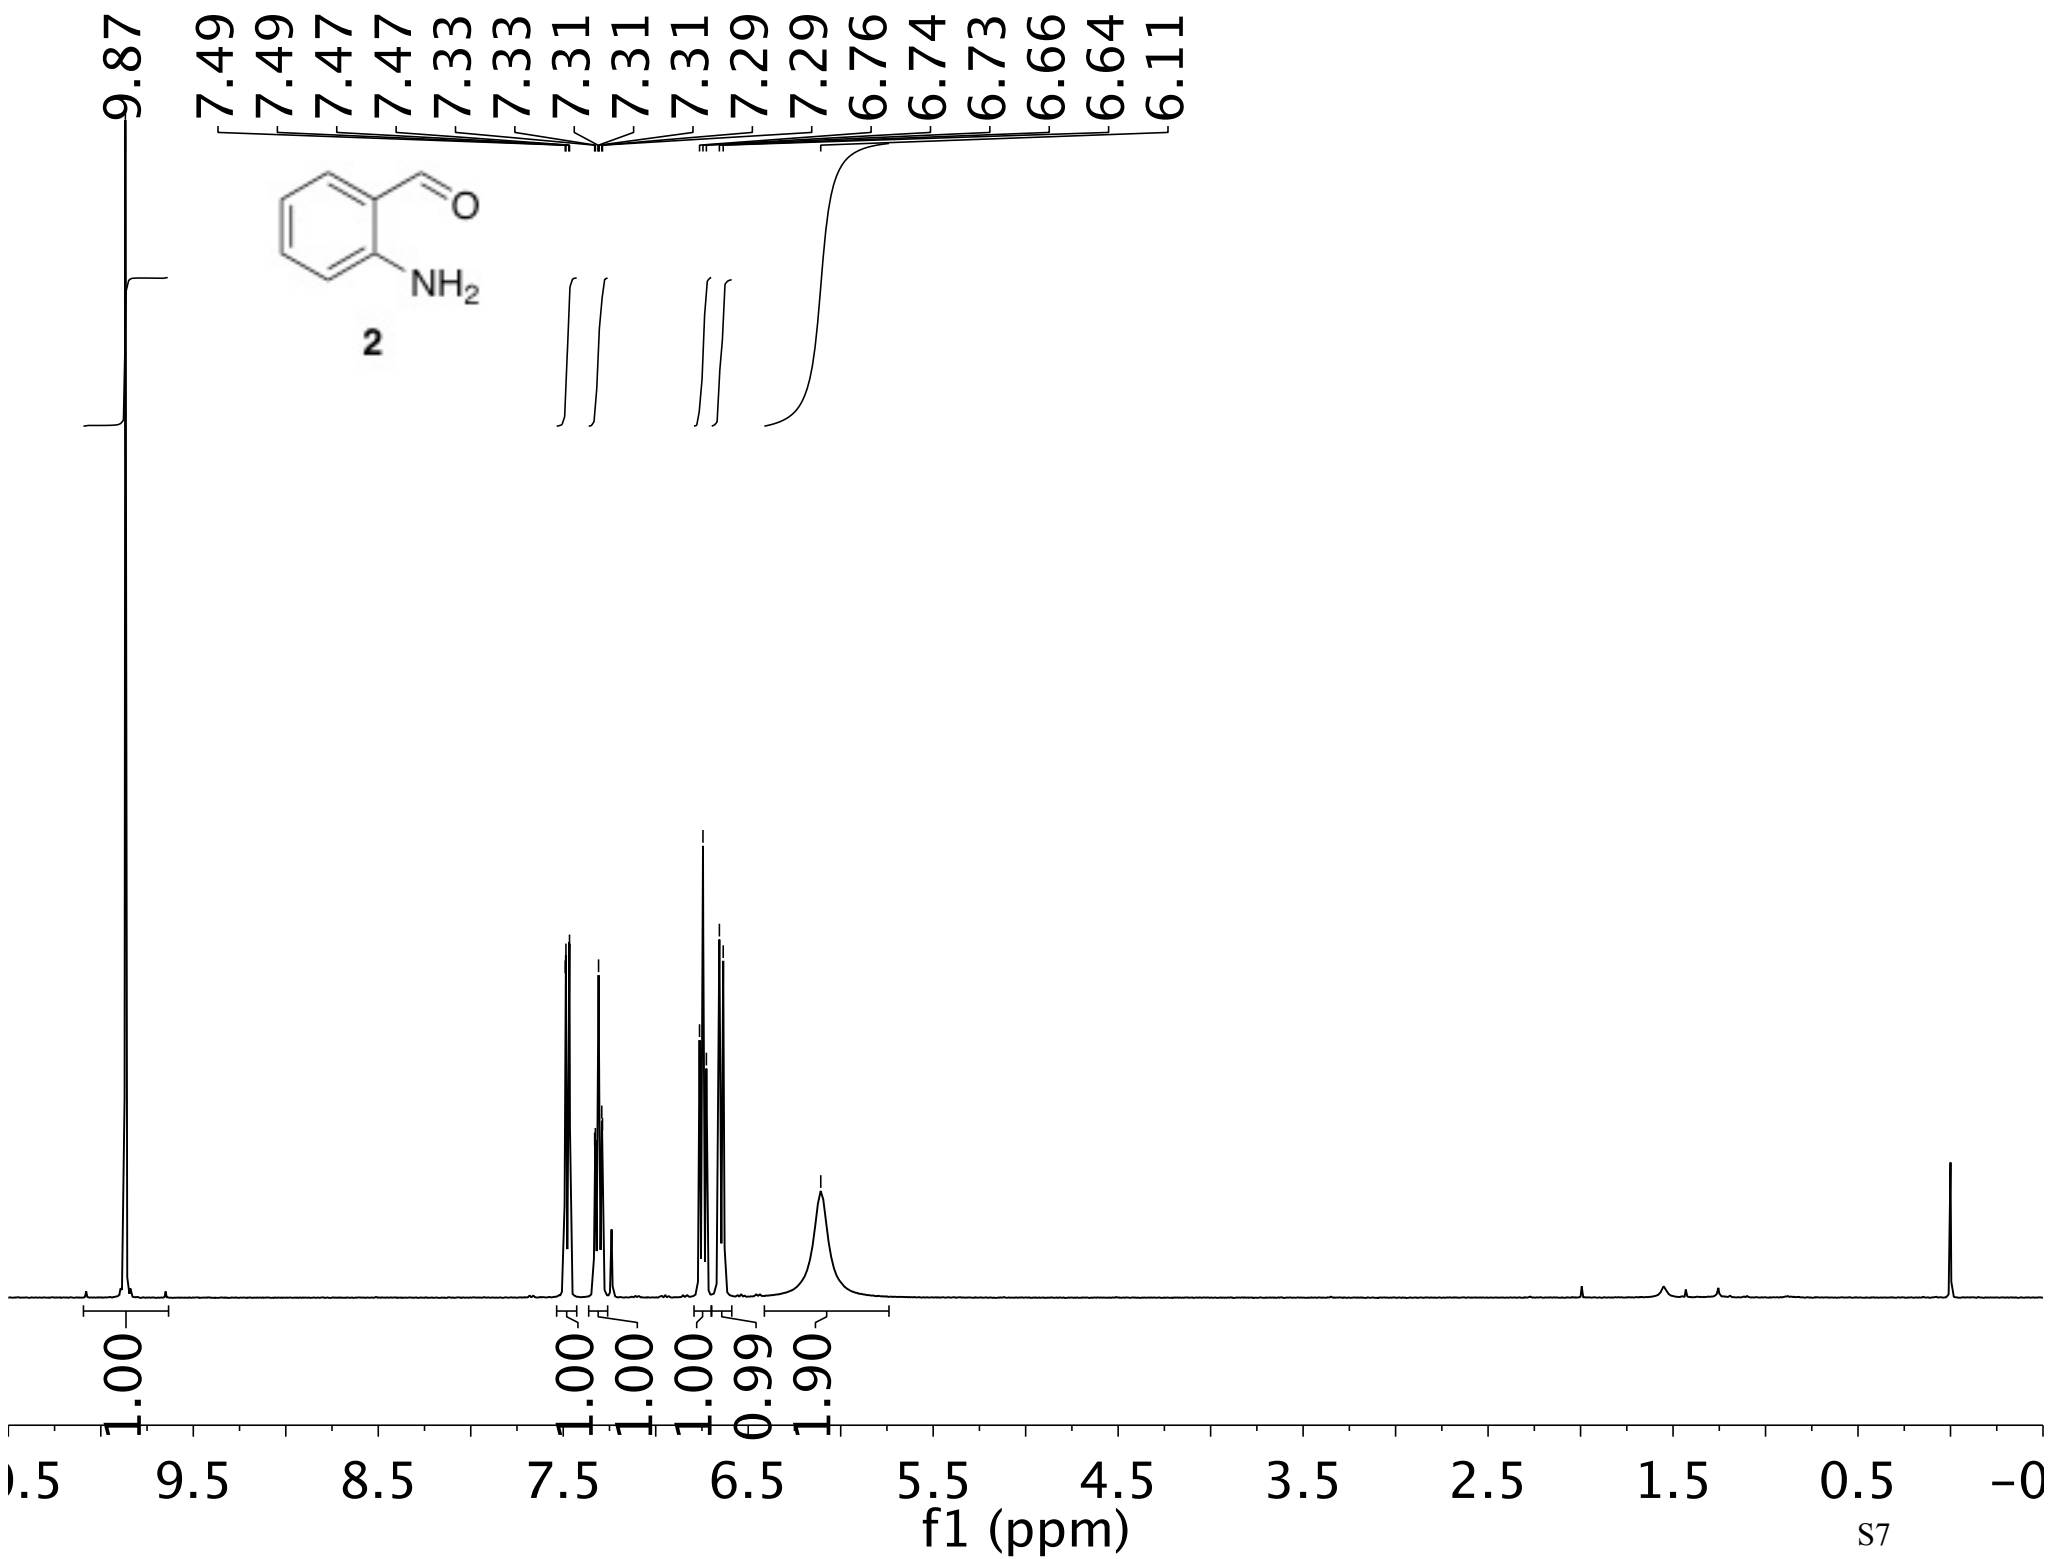

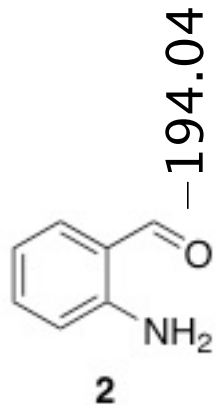

194.04

149.83

135.69

135.16

118.81

116.34

116.03

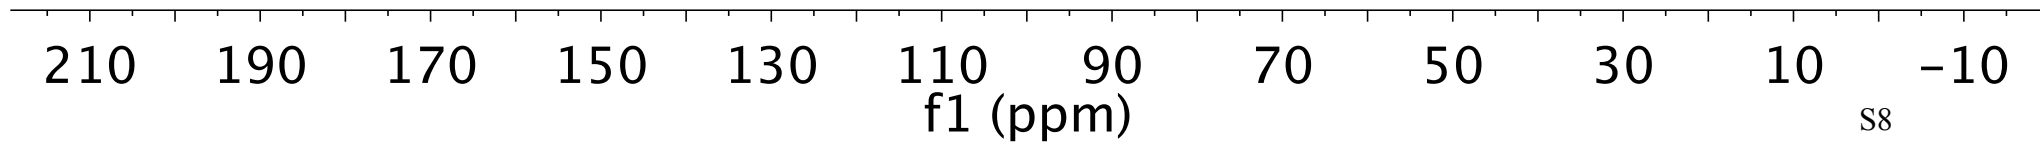



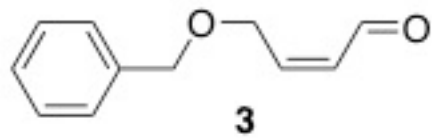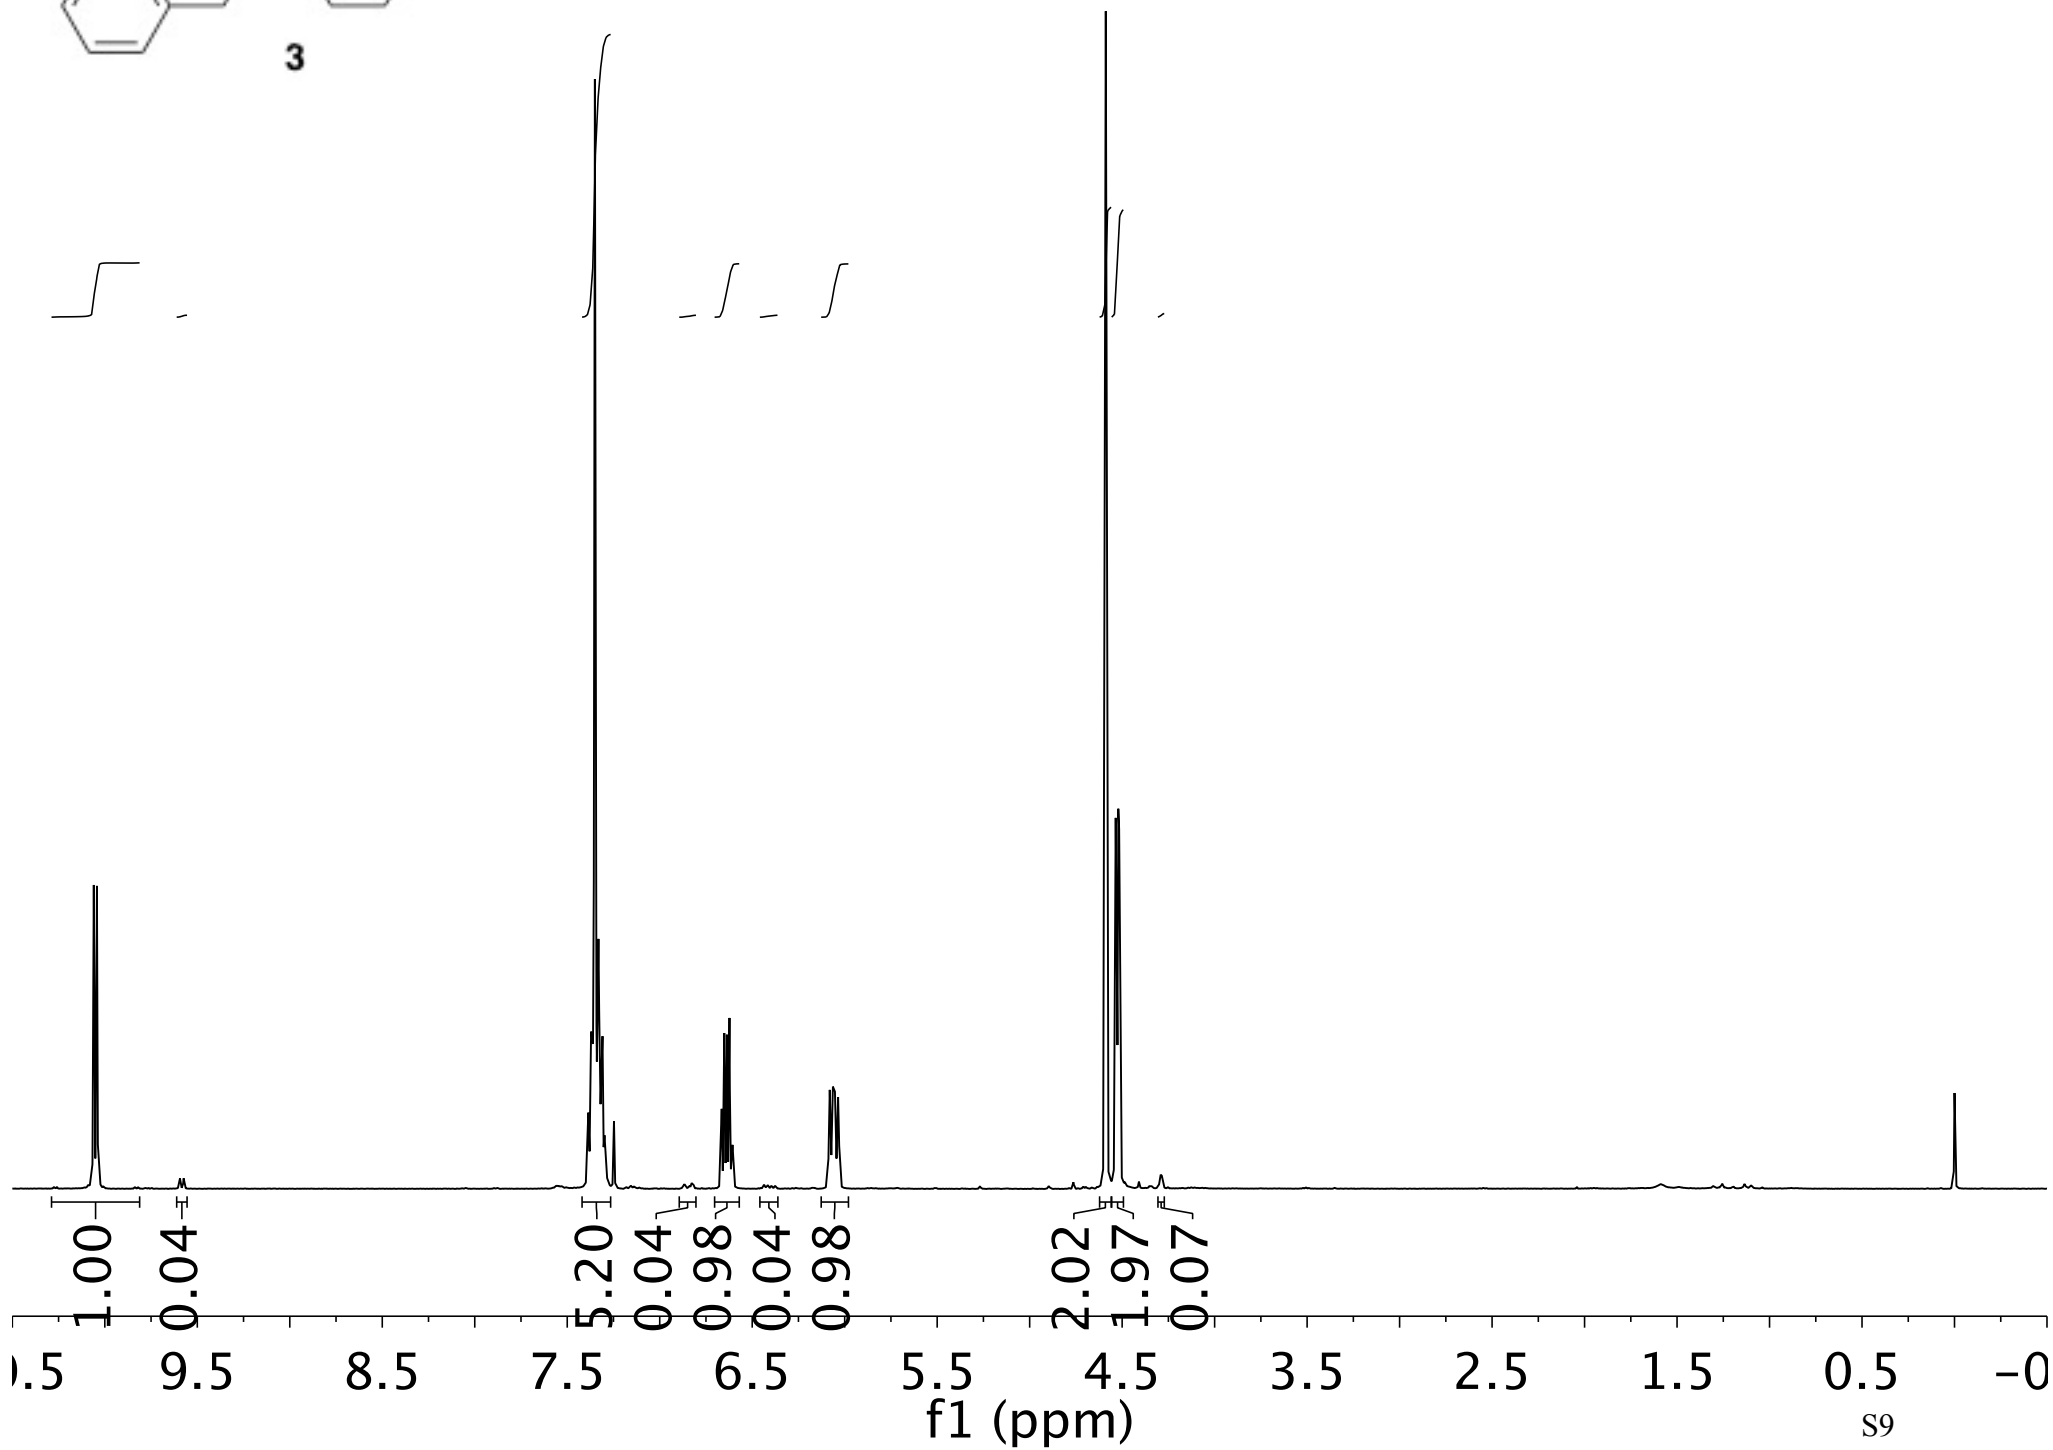

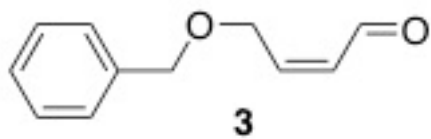

191.62

147.69

137.49

129.91

128.75

128.20

128.00

73.26

67.15

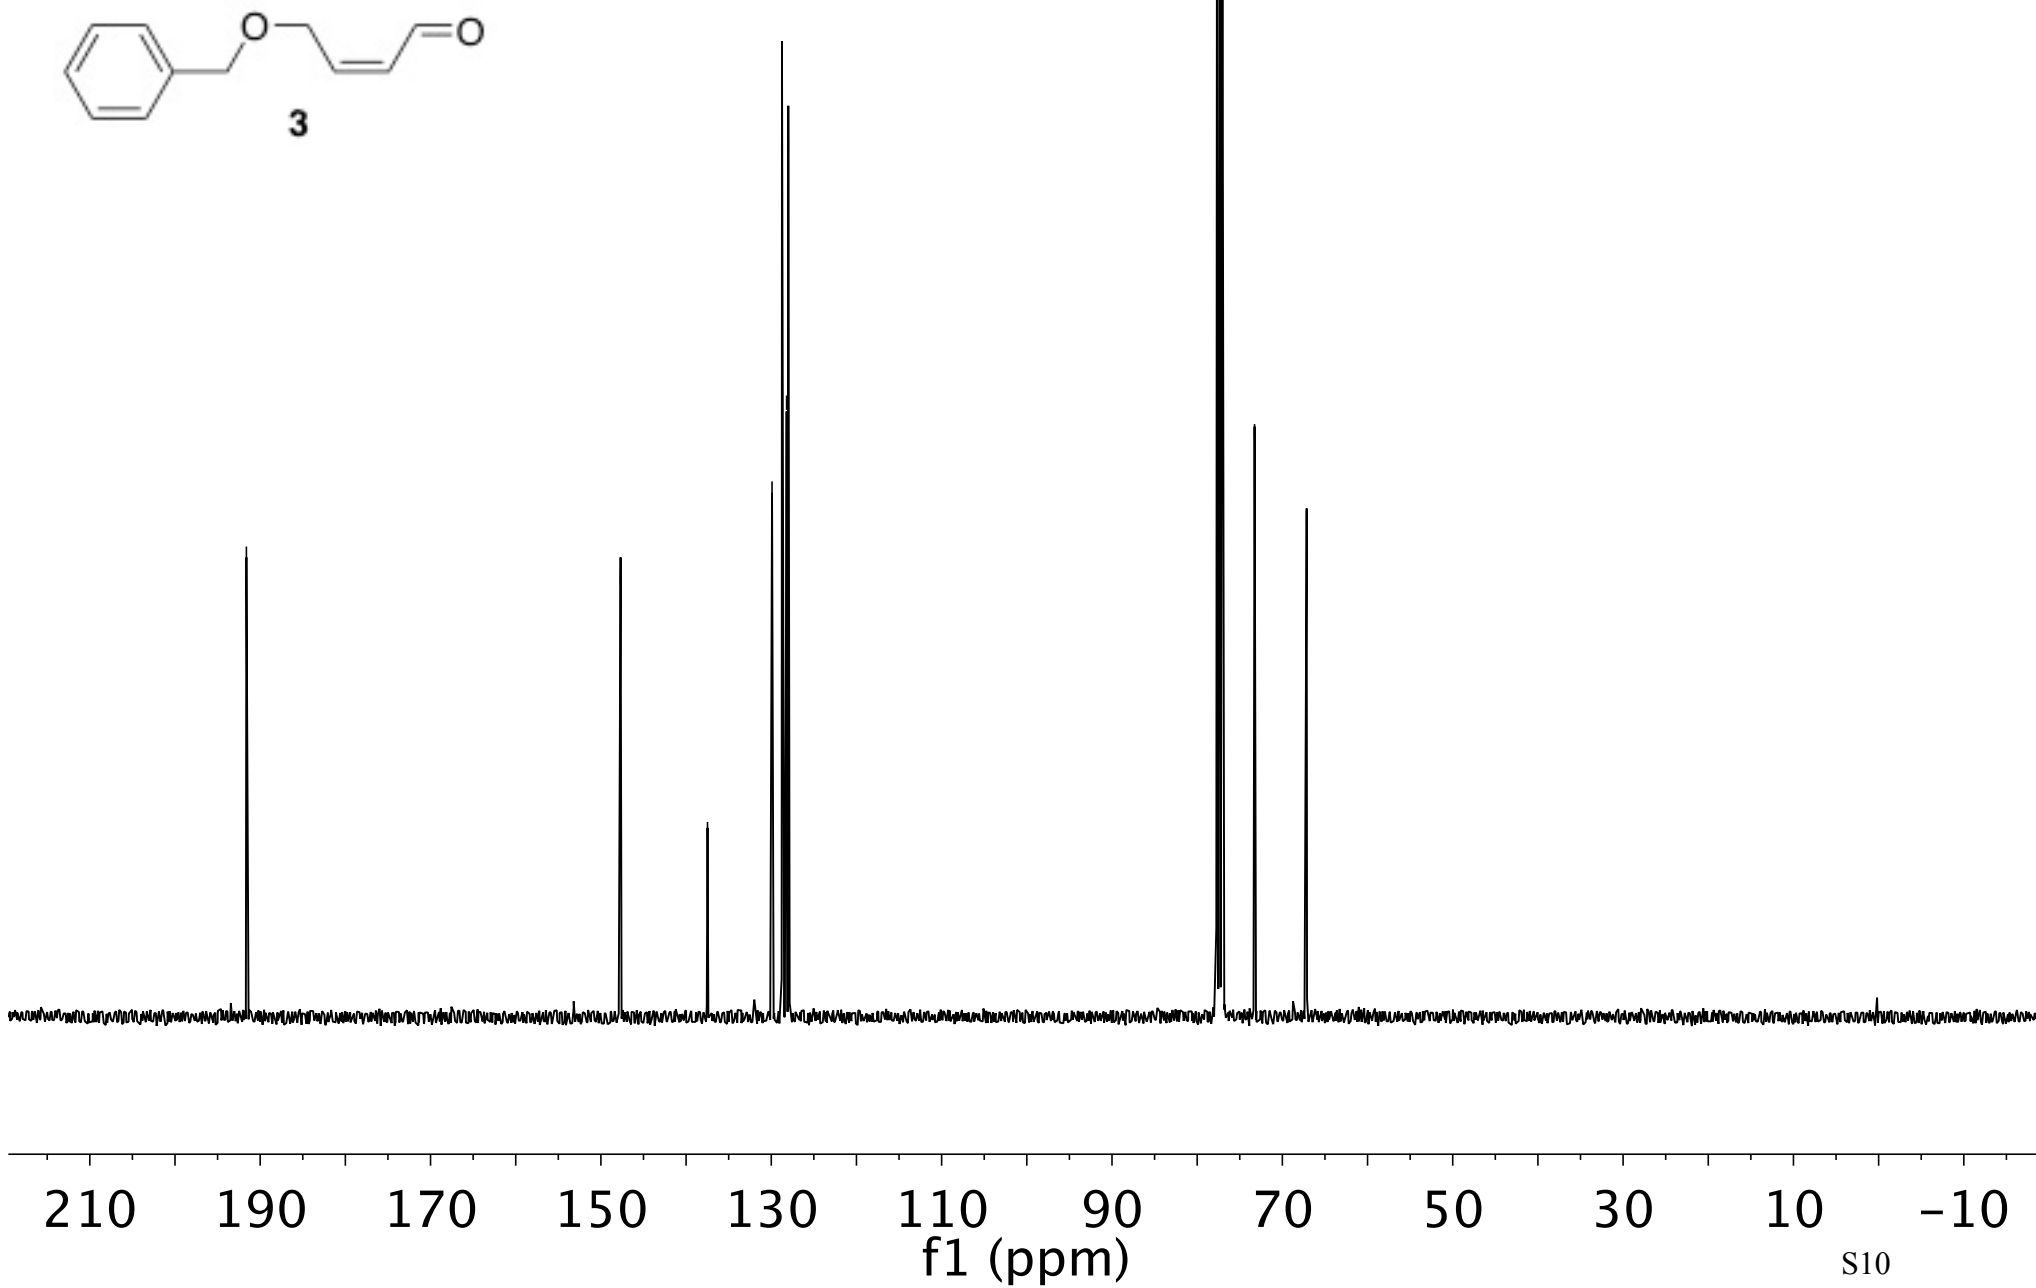

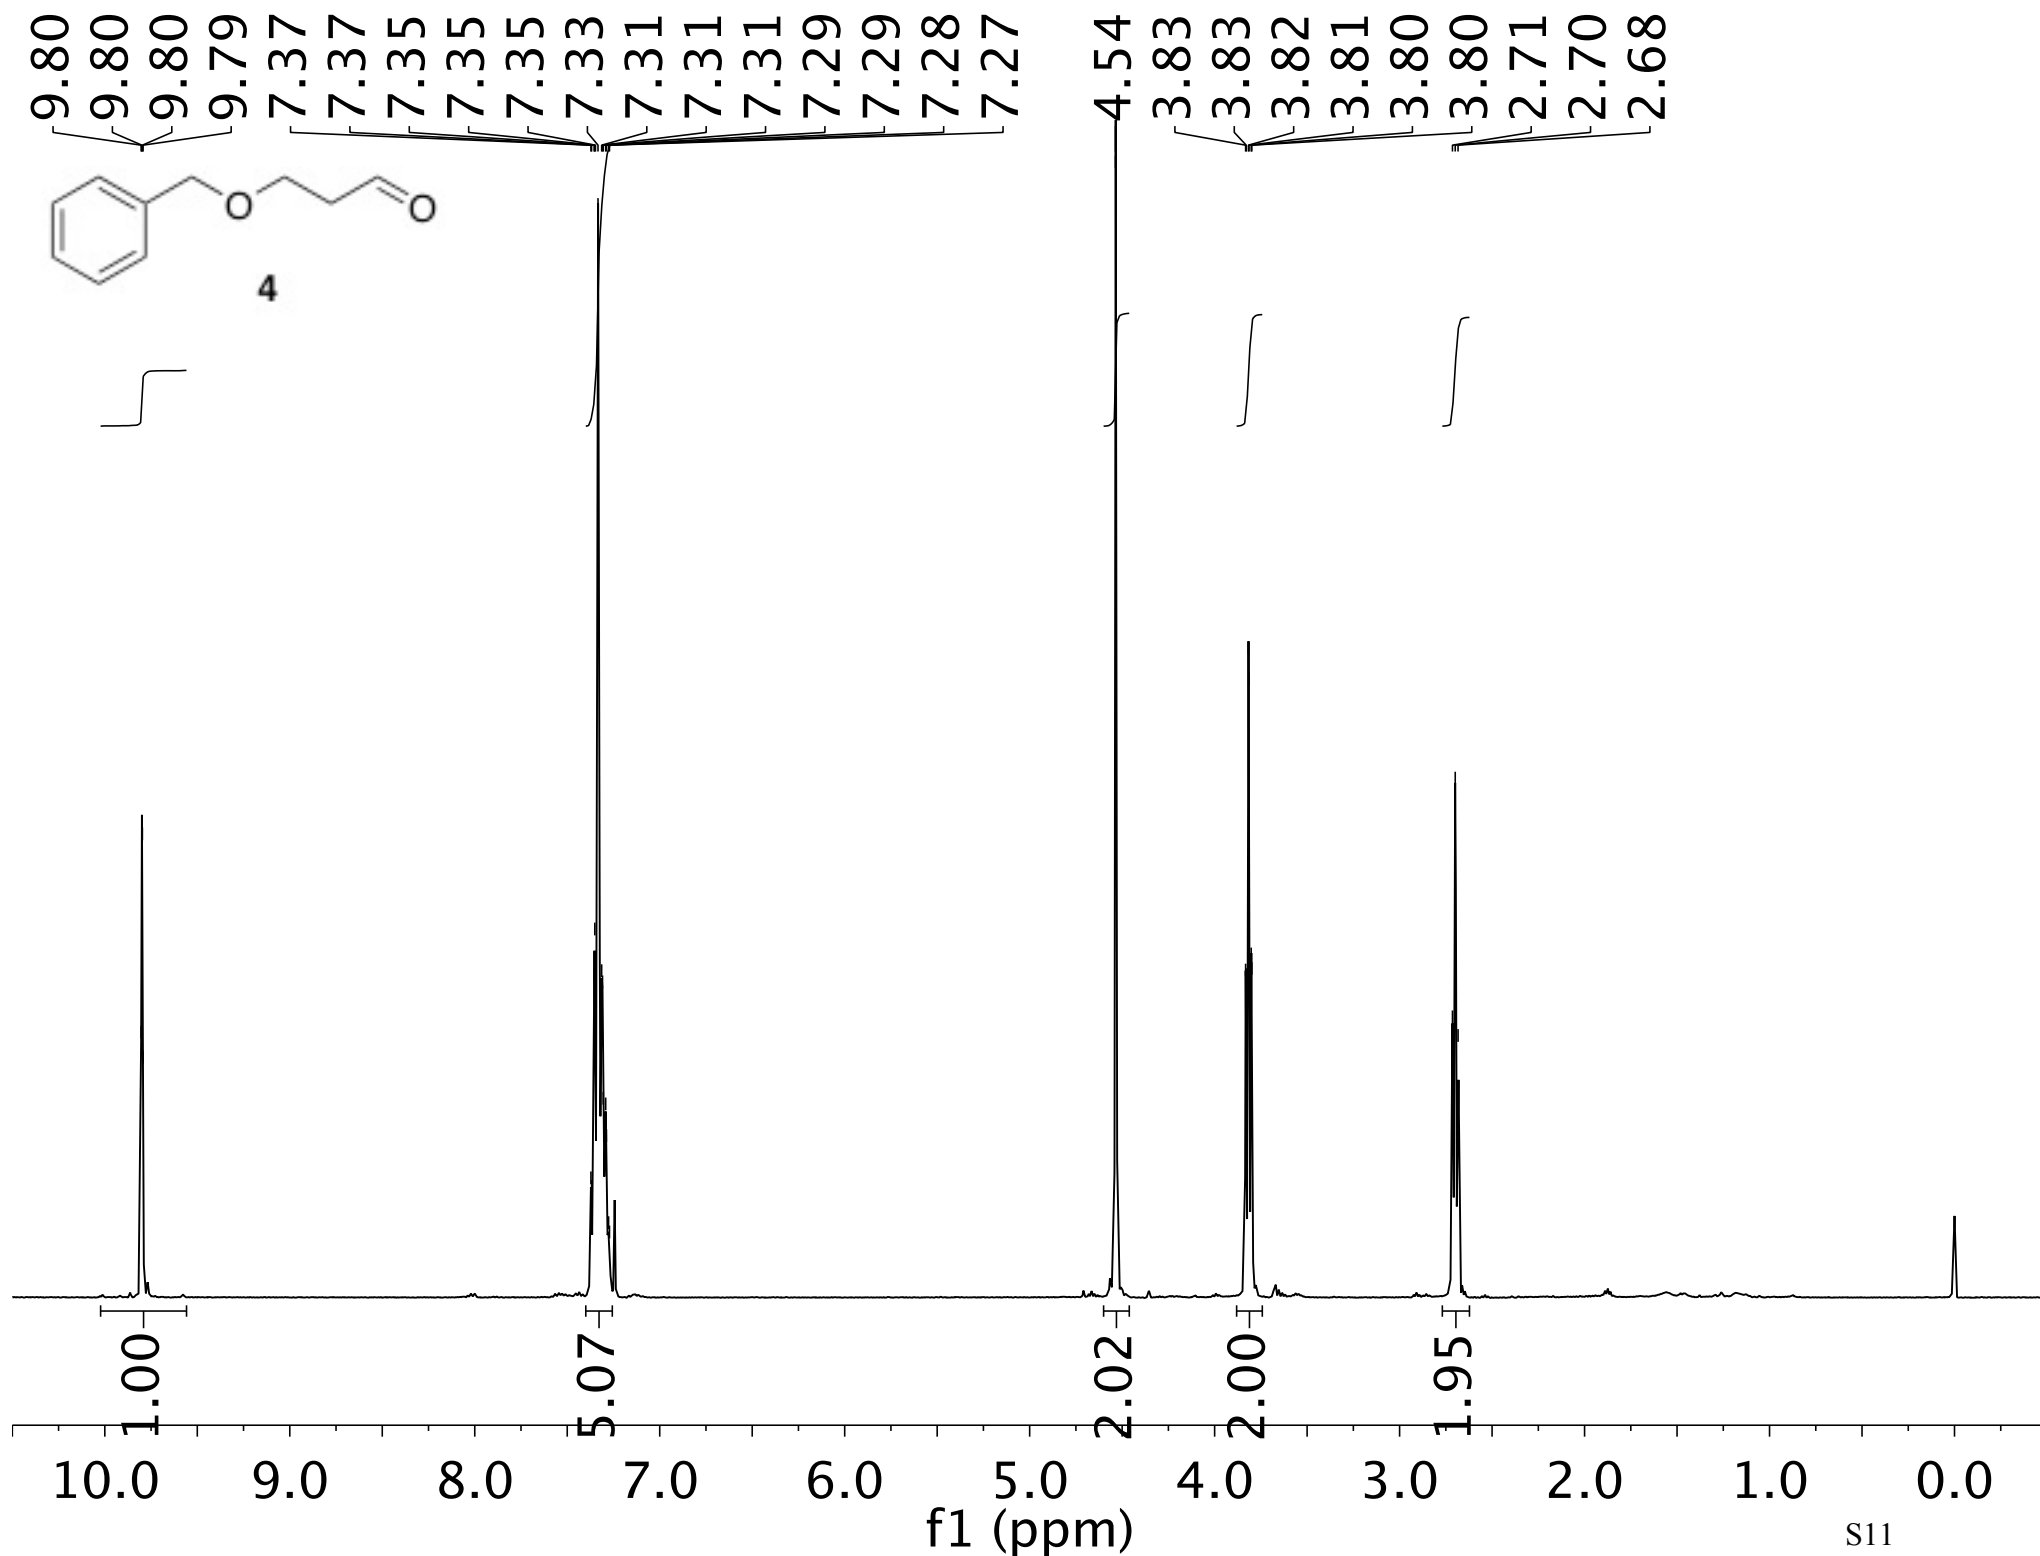

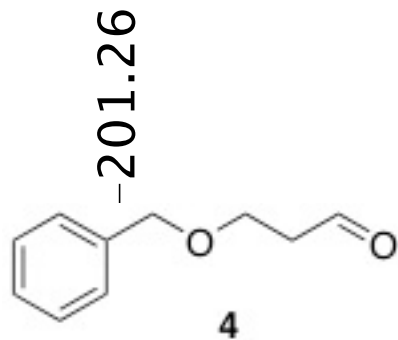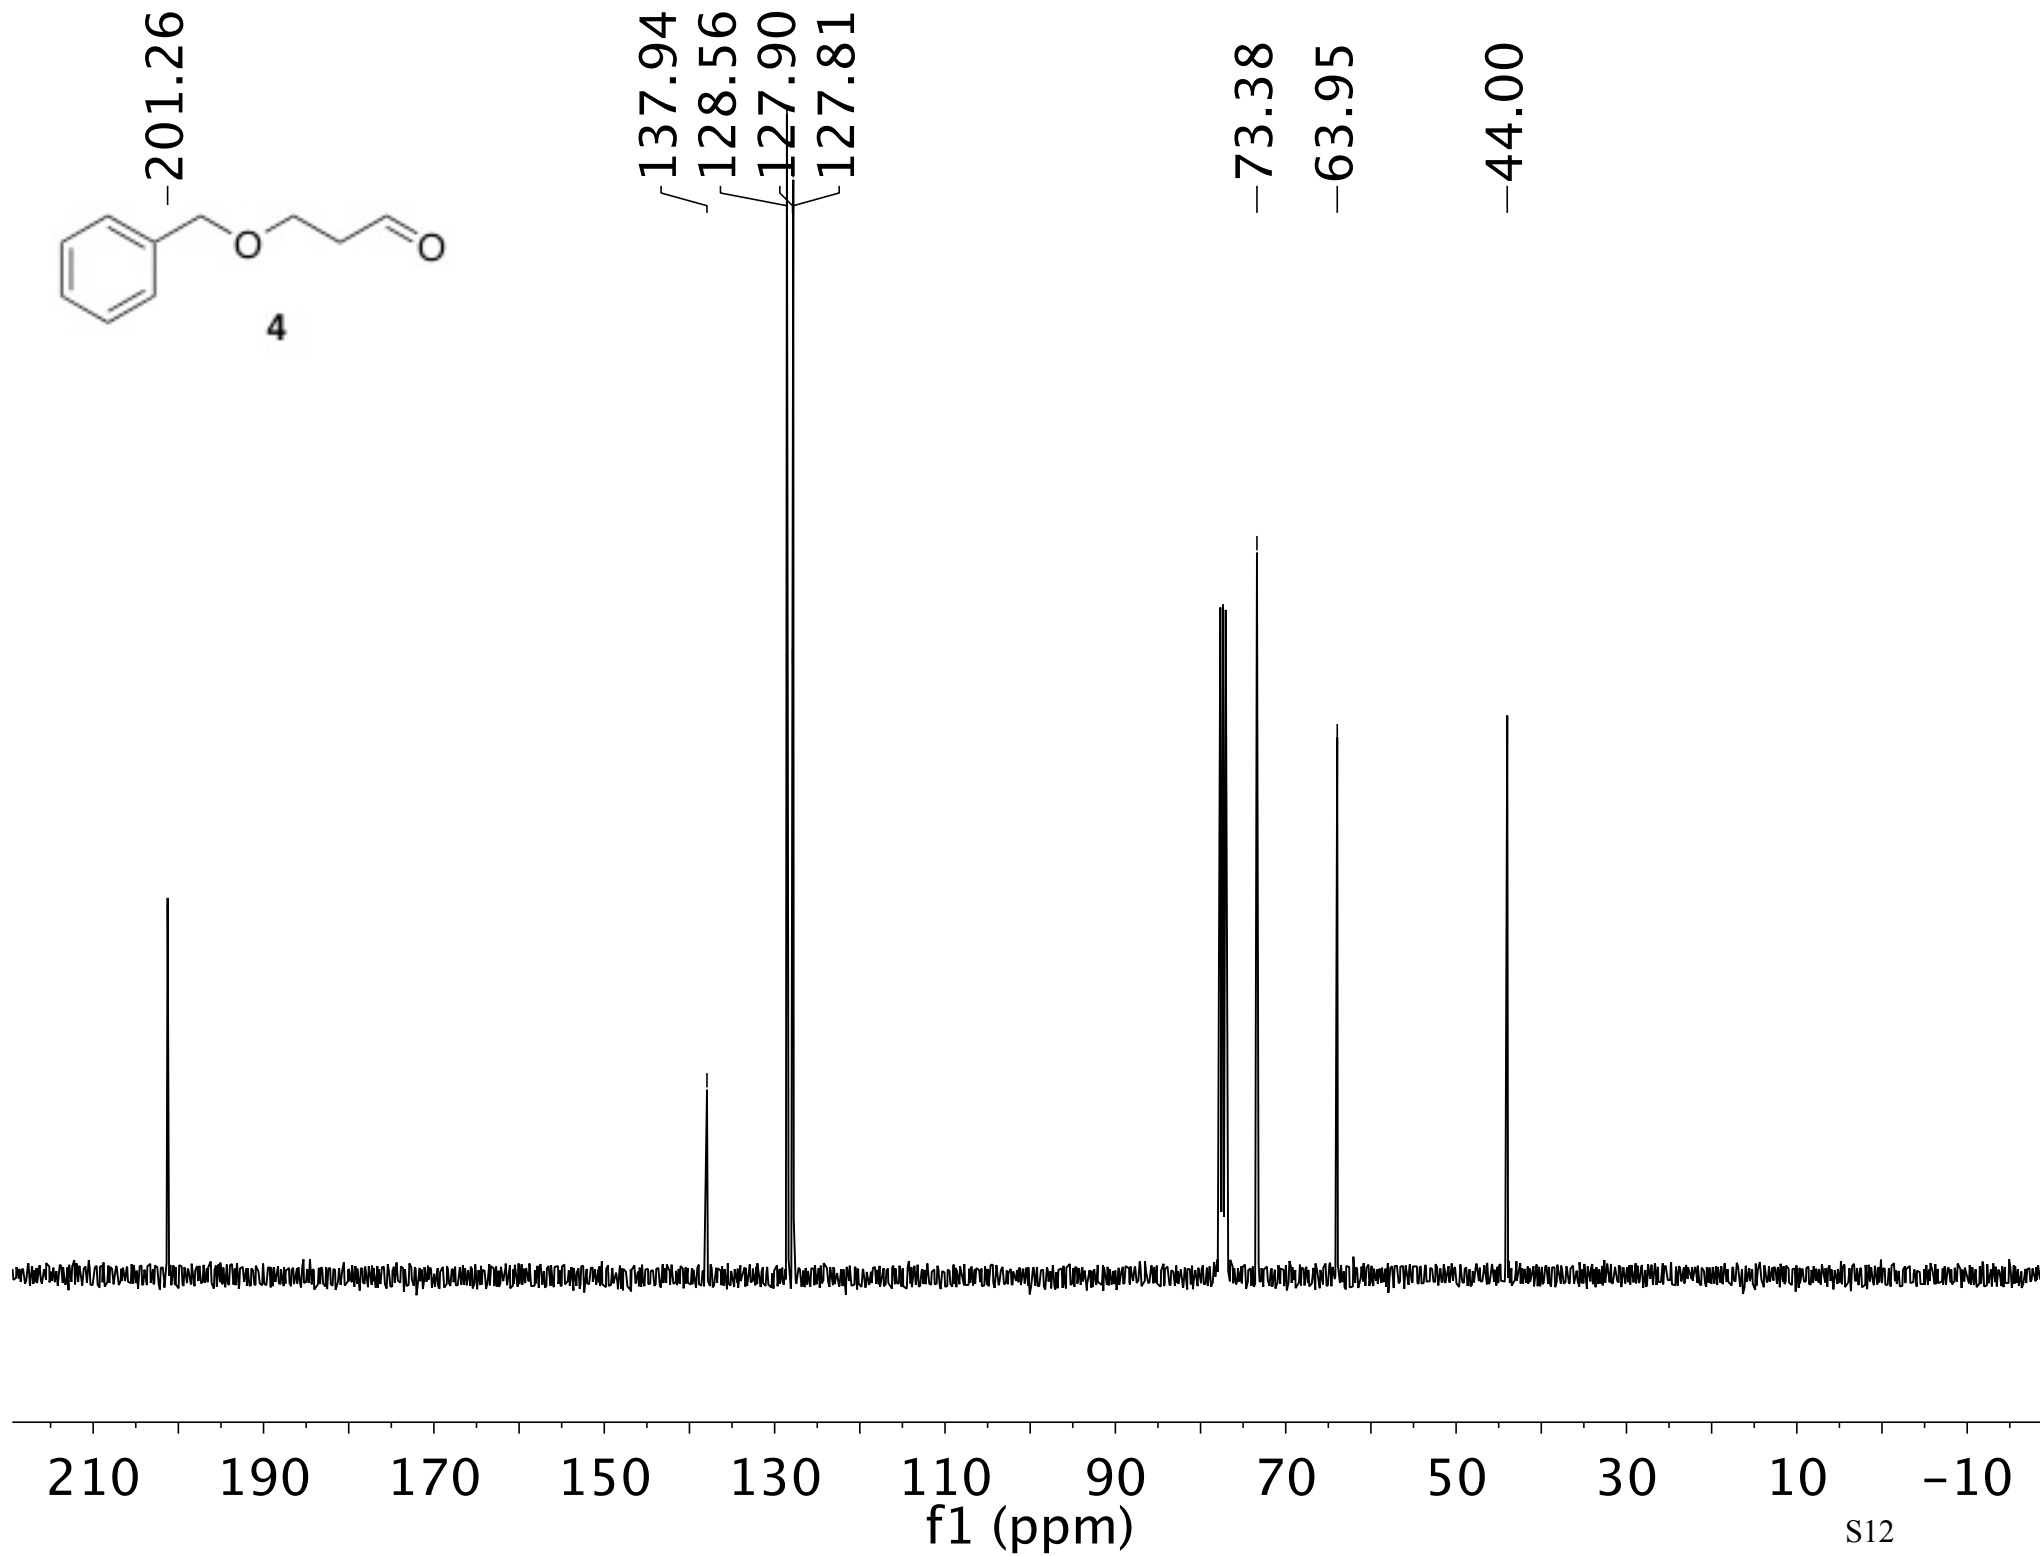

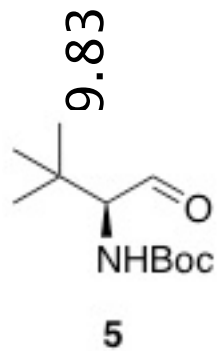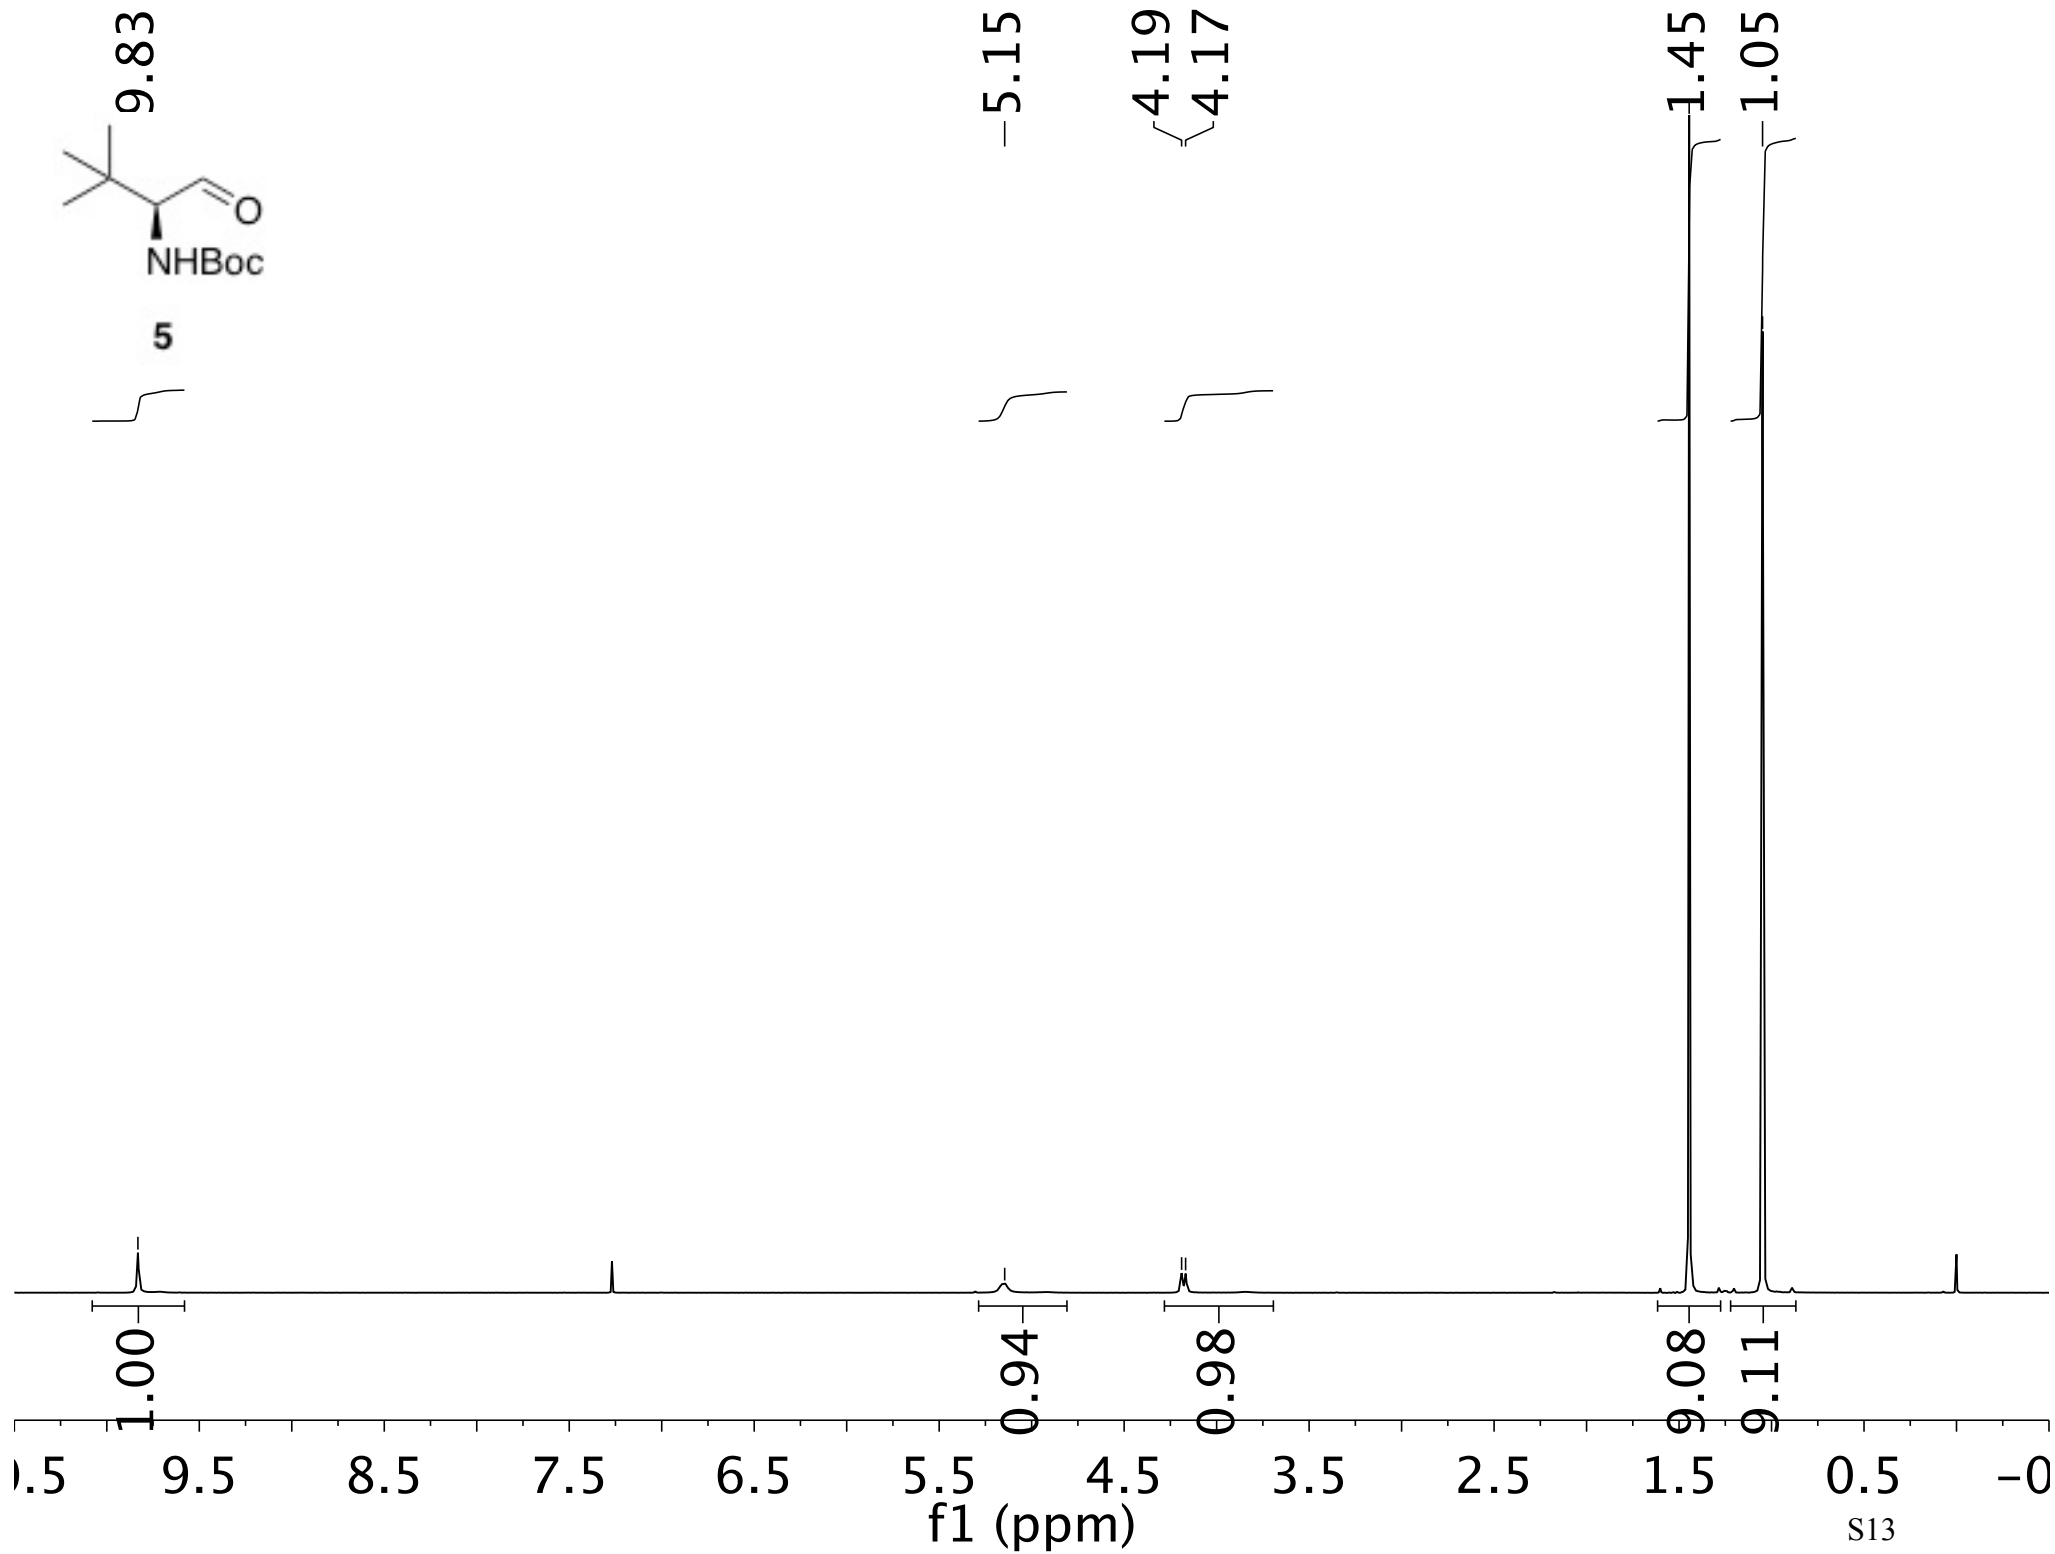

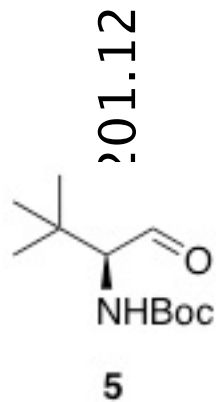

201.12

155.92

79.87

67.43

35.60

28.28

26.77

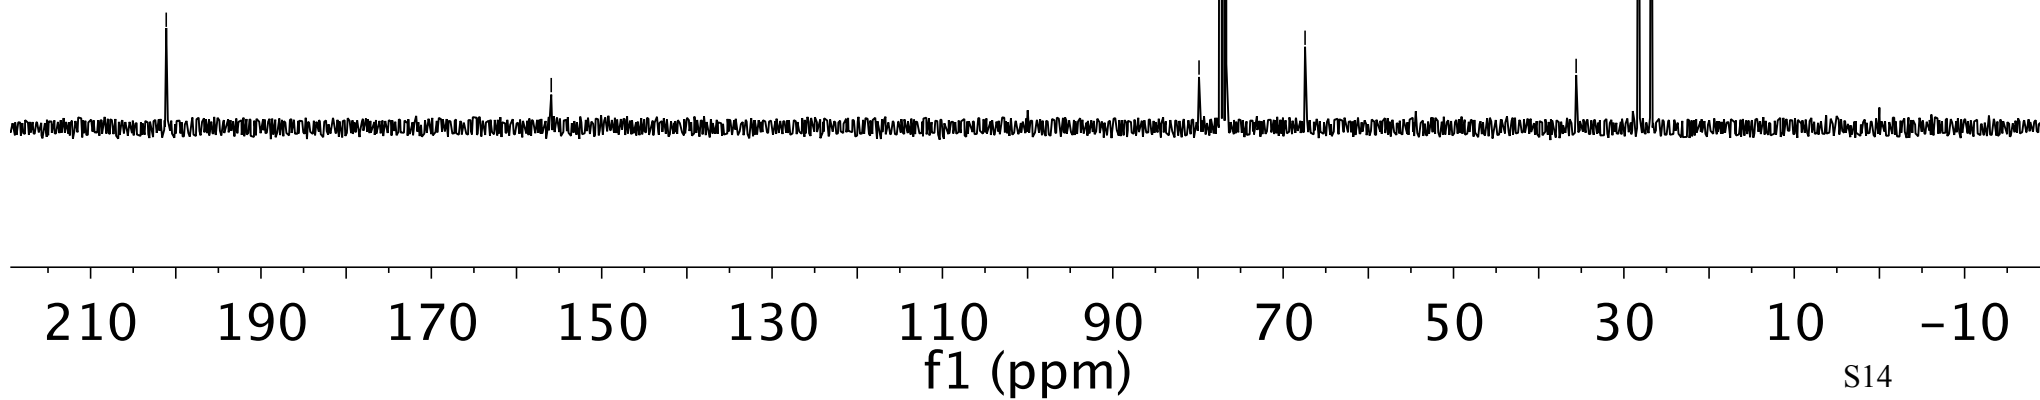

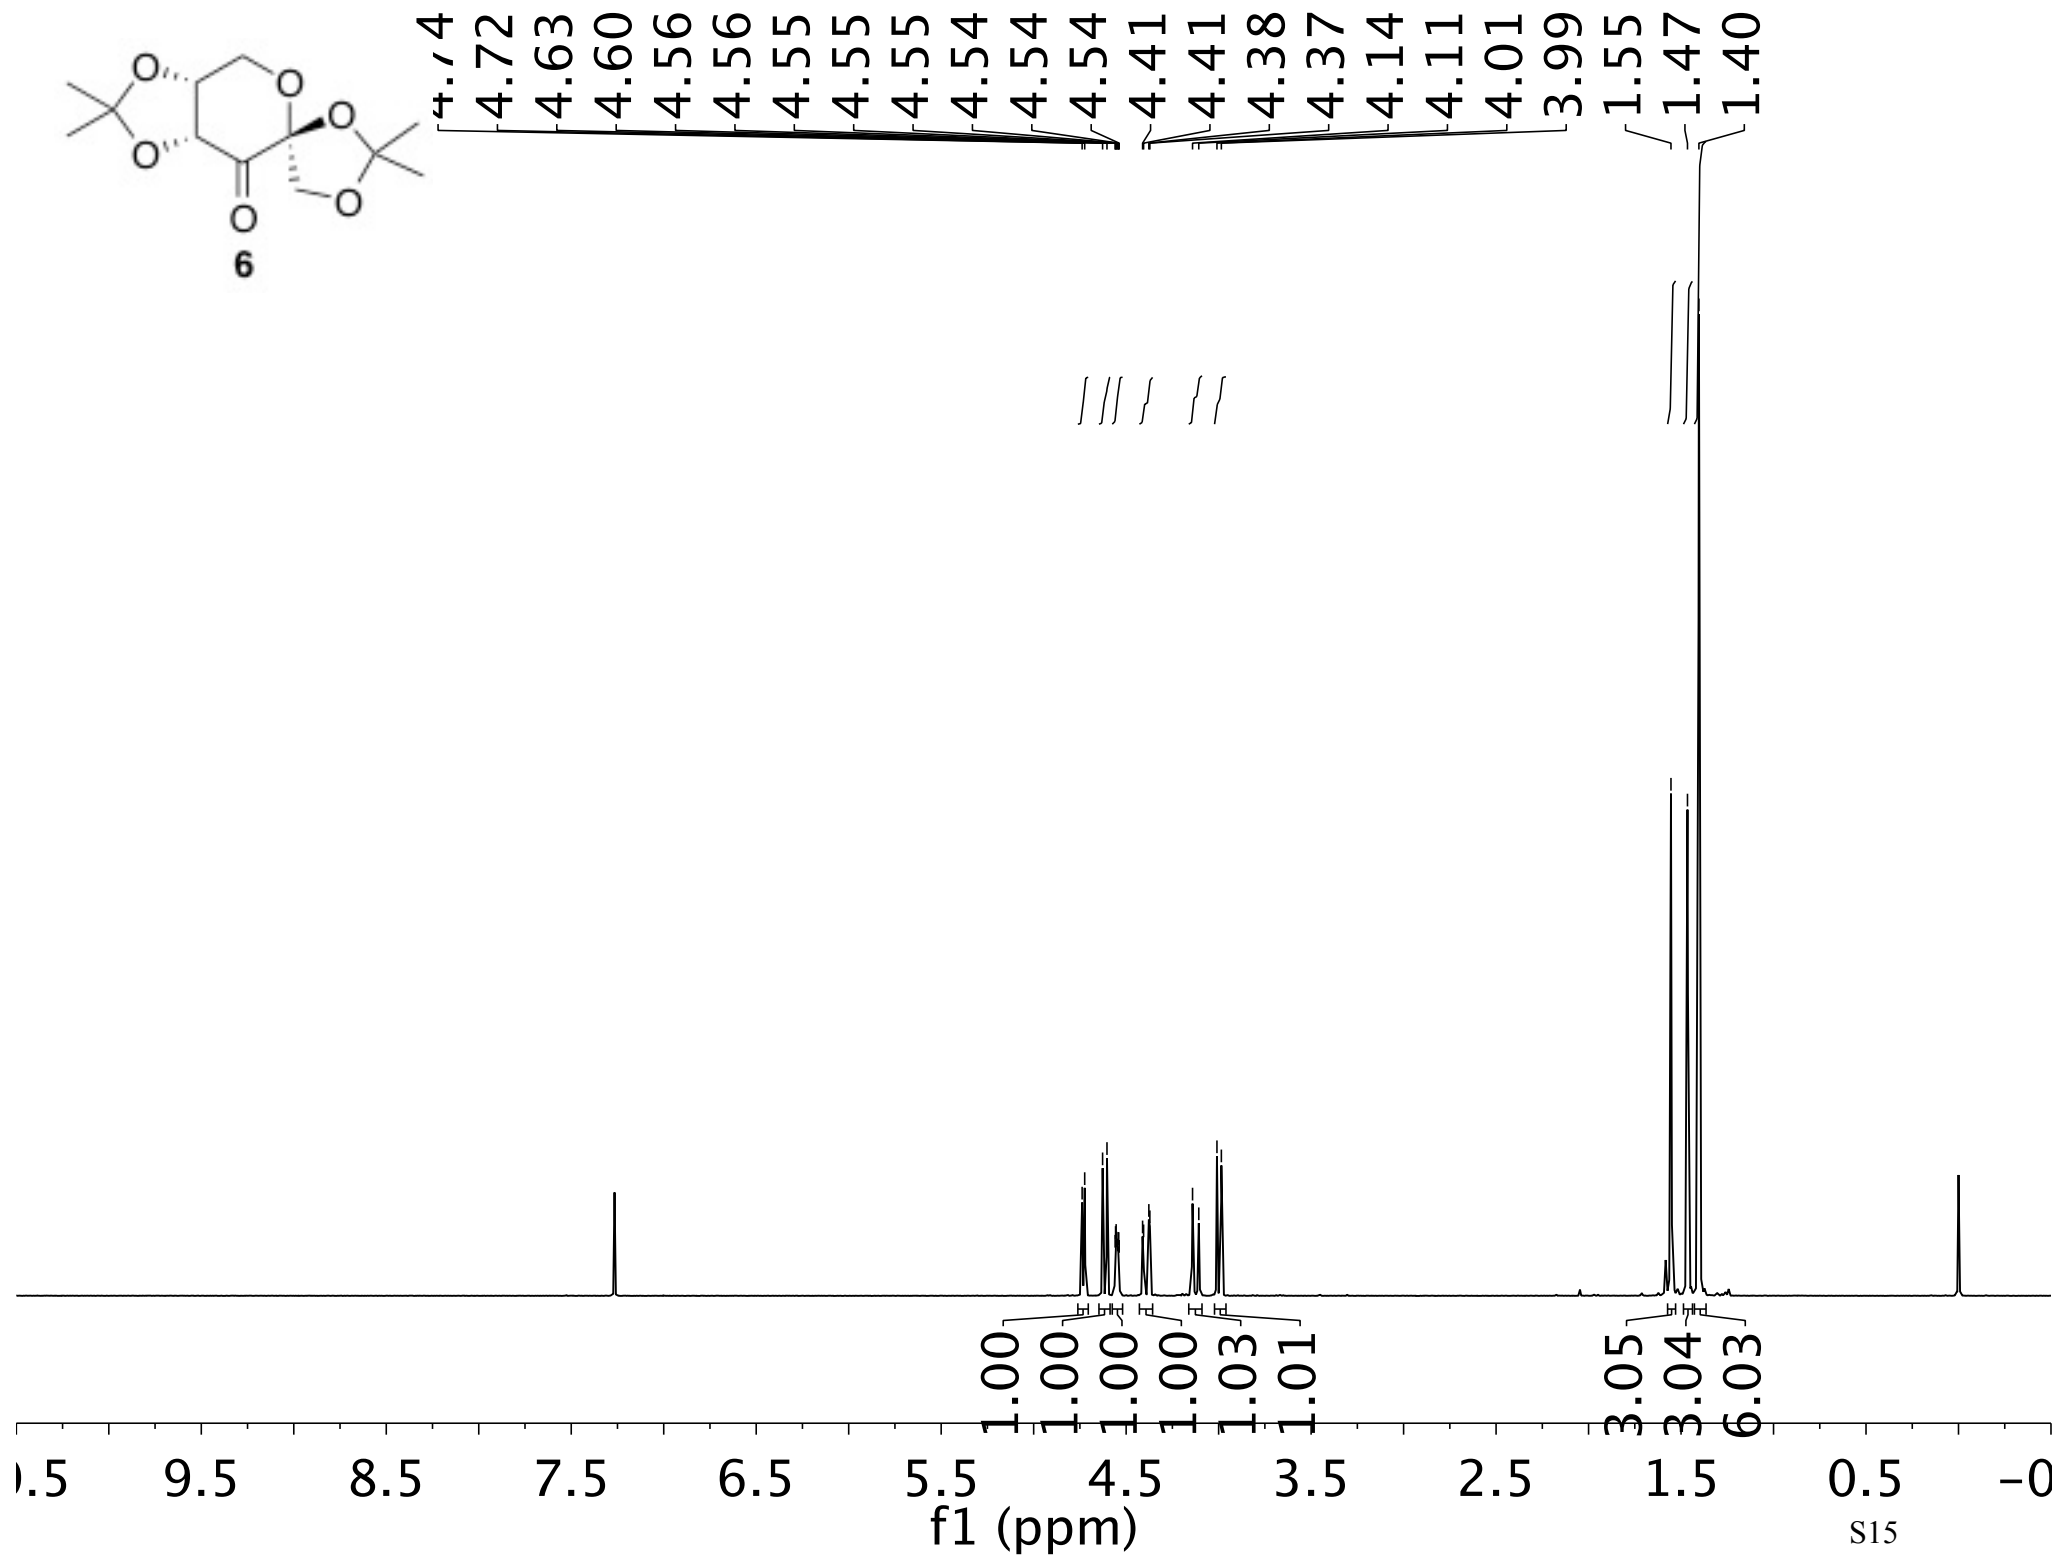

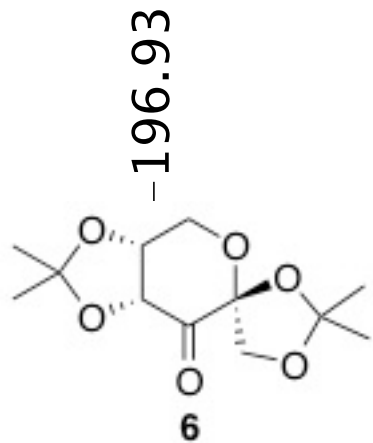



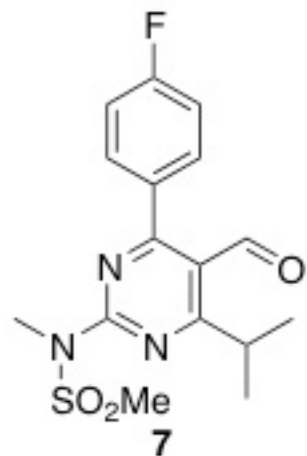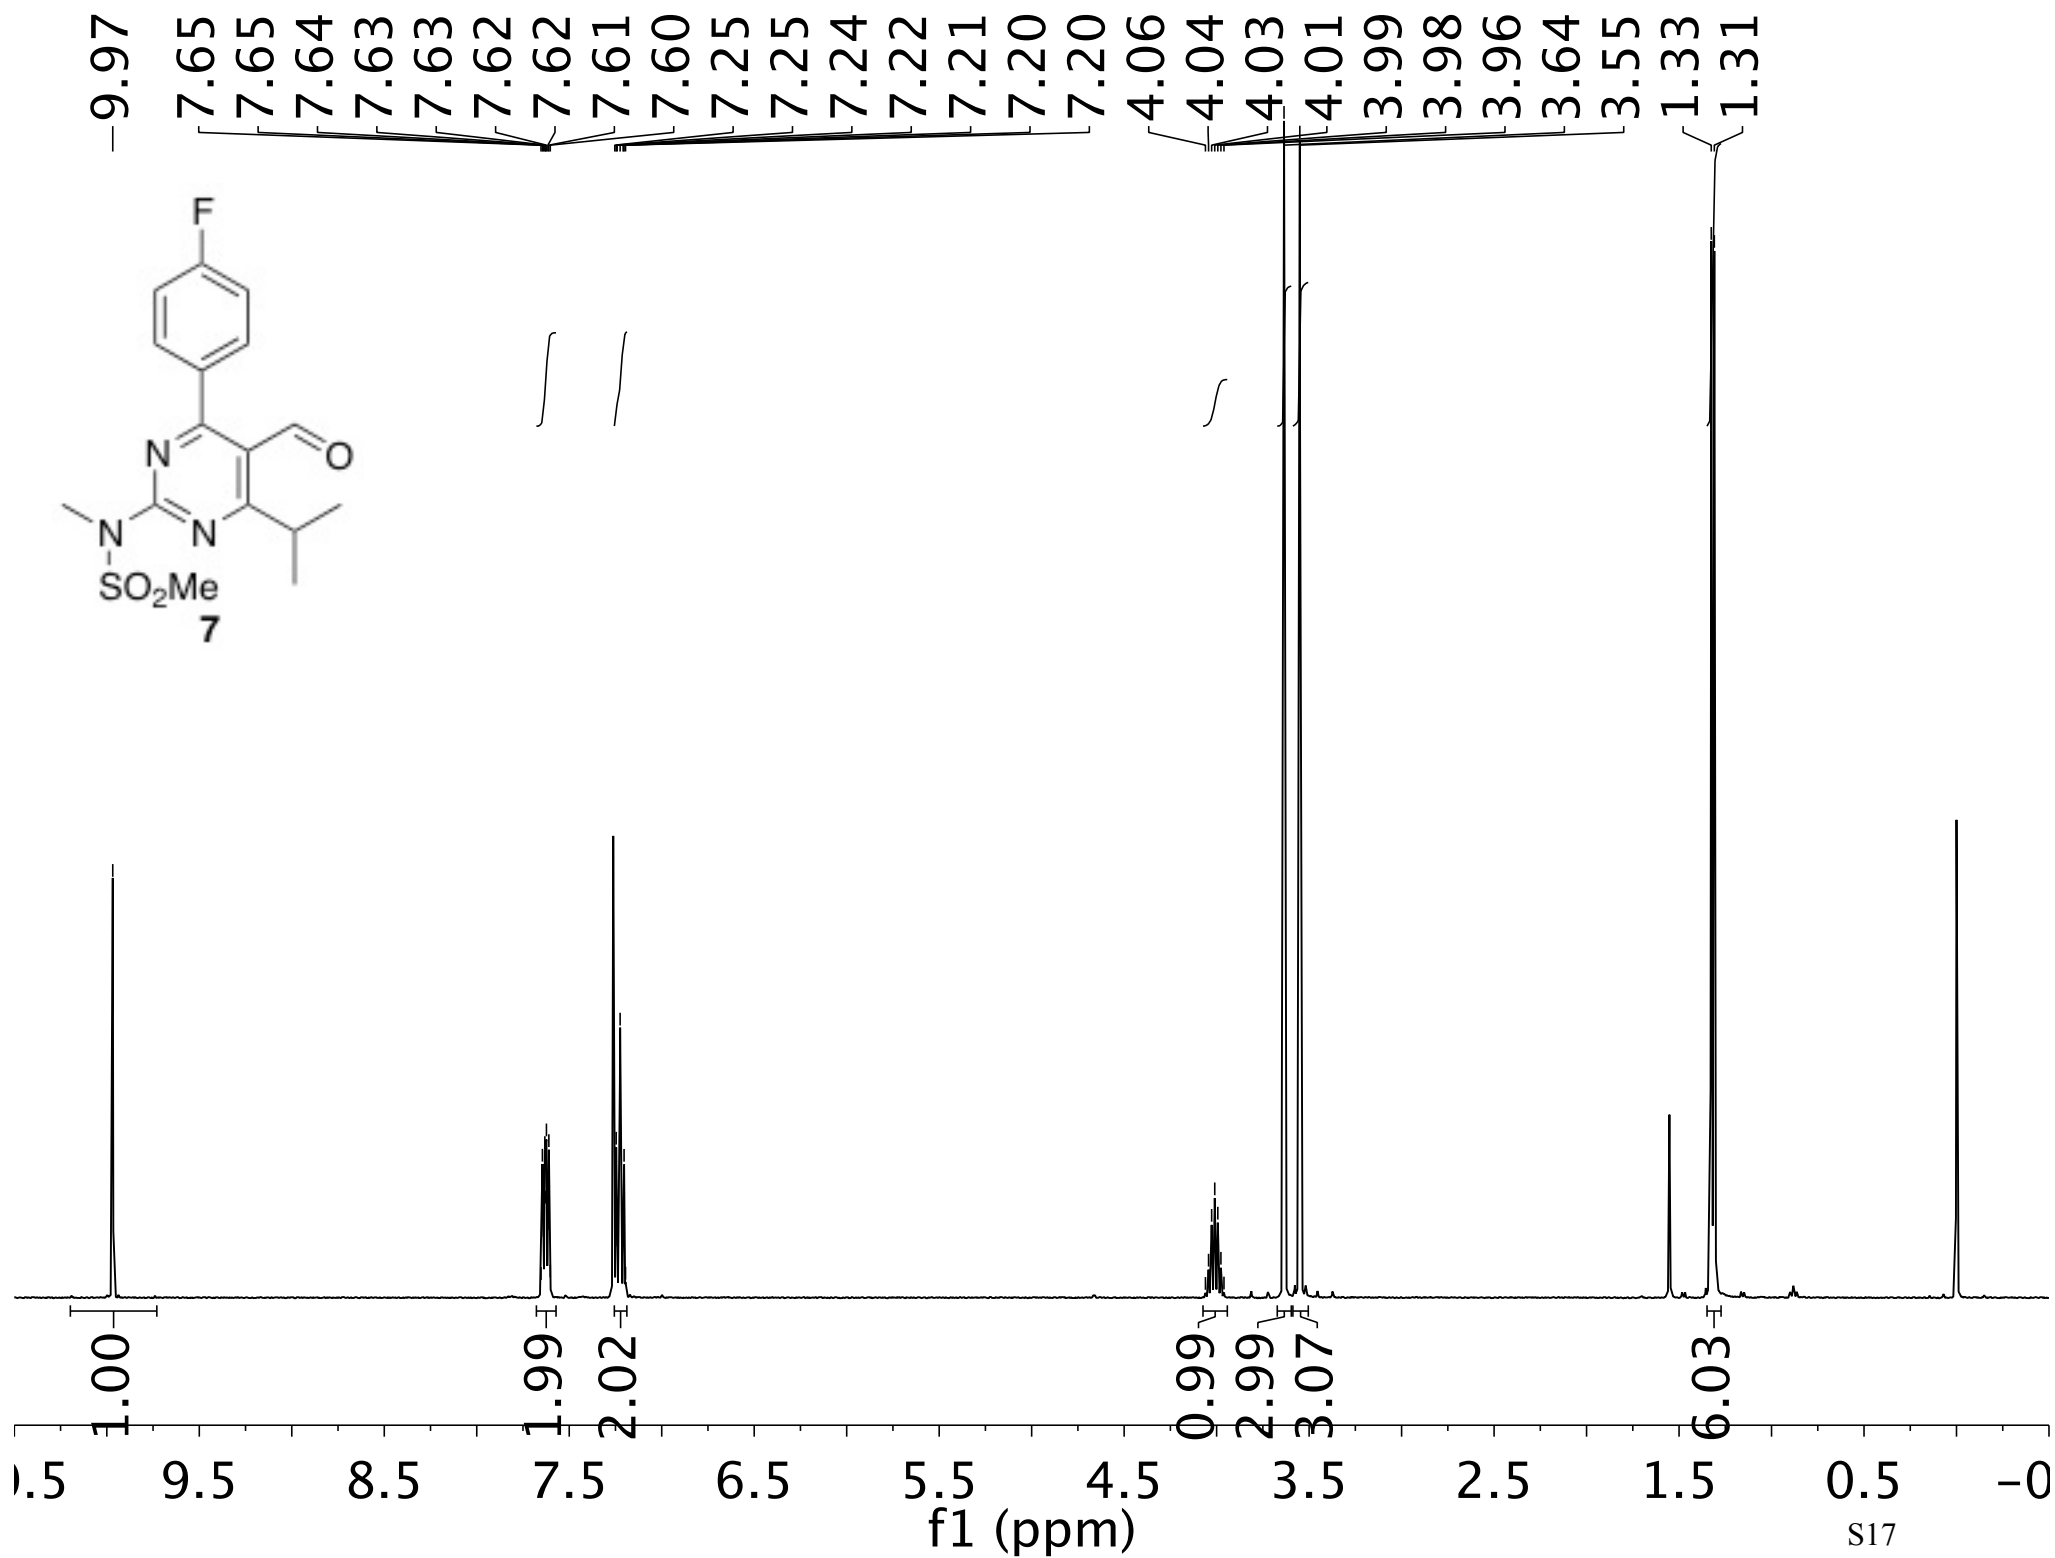

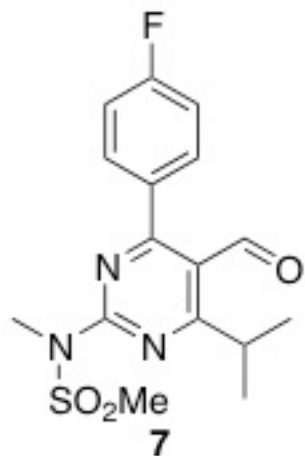

190.52  
179.08  
169.82  
165.74  
163.23  
158.83

132.70  
132.61  
132.16  
132.13  
119.54  
116.12  
115.90

42.56  
33.13  
32.03  
21.73

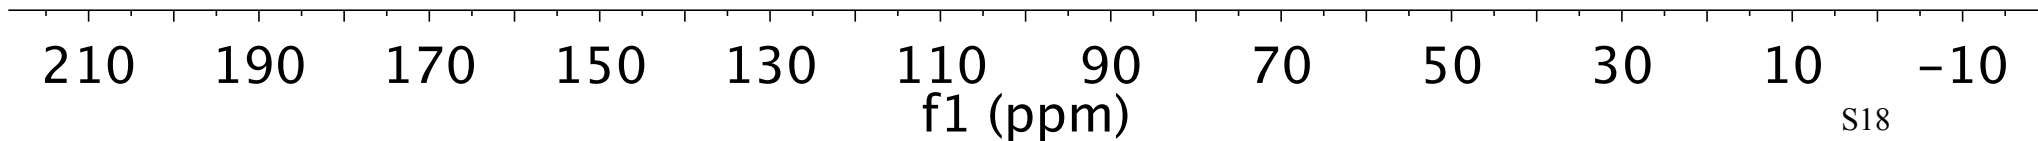



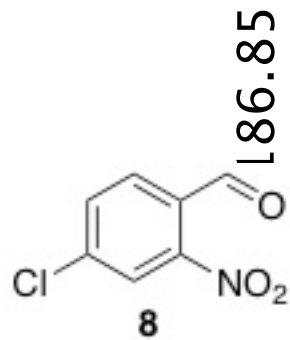

150.05  
140.23  
134.19  
130.93  
129.31  
124.81

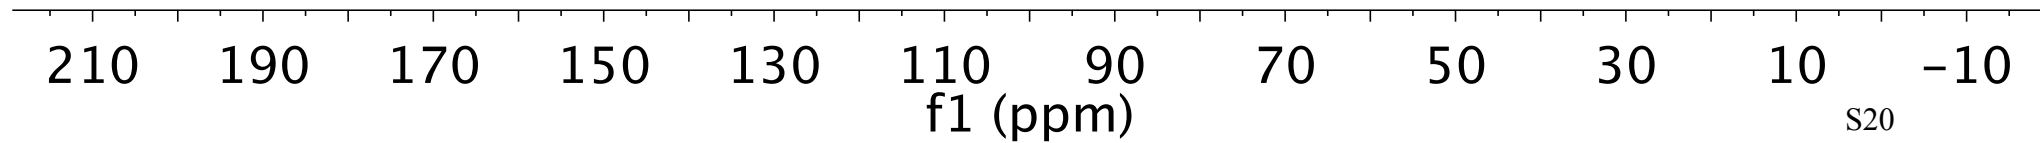

Supplement: Supplementary file 1 [file 3745234]
